# Supplementary material for: A dithieno[3,2-b:2′,3′-d]pyrrole based, NIR absorbing, solution processable, small molecule donor for efficient bulk heterojunction solar cells
Source: Royal Society of Chemistry journal article supplement (doi:10.1039/c6cp06304g), 2016-01-01
Supplement: c6cp06304g1.pdf [file c6cp06304g1.pdf]

## Electronic Supplementary Information

### Dithieno[3,2-*b*:2',3'-*d*]pyrrole based, NIR absorbing, solution processable, small molecule donor for efficient bulk heterojunction solar cells.

Manohar Reddy Busireddy,<sup>a</sup> Venkata Niladri Raju Mantena,<sup>a</sup> Narendra Reddy Chereddy,<sup>a,\*</sup> Balaiah Shanigaram,<sup>b</sup> Bhanuprakash Kotamarthi,<sup>b,\*</sup> Subhayan Biswas,<sup>c</sup> Ganesh Datt Sharma<sup>c,\*</sup> and Jayathirtha Rao Vaidya<sup>a,d,\*</sup>

<sup>a</sup>*Crop Protection Chemicals Division, <sup>b</sup>Inorganic & Physical Chemistry Division, <sup>d</sup>AcSIR, CSIR-Indian Institute of Chemical Technology, Hyderabad-500 007, India*

<sup>c</sup>*Department of Physics, The LNM Institute of Information Technology, Jamdoli, Jaipur, India.*

Corresponding author Tel.: +91 40 27193933; +91 40 27193174

E-Mail: [chereddynarendra@gmail.com](mailto:chereddynarendra@gmail.com); [jrao@iict.res.in](mailto:jrao@iict.res.in); [gdsharma273@gmail.com](mailto:gdsharma273@gmail.com)

| Table of contents                                                                                             | Page   |
|---------------------------------------------------------------------------------------------------------------|--------|
| <sup>1</sup> H- and <sup>13</sup> C-NMR spectra of <b>ICT3</b> (Figs. S1-S2)                                  | S2-S3  |
| MALDI-MS analytical data of <b>ICT3</b> (Figs. S3)                                                            | S4     |
| Chemical structures of <b>ICT1</b> and <b>ICT2</b> and their photophysical and electrochemical data (Fig. S4) | S5     |
| Absorption and emission spectra of <b>ICT3</b> (Fig. S5)                                                      | S5     |
| Optimized structure of <b>ICT3</b> (Fig. S6)                                                                  | S6     |
| Results of the theoretical calculations (Tables S1-S3)                                                        | S6     |
| Percentage contribution of different moieties of <b>ICT3</b> to their HOMO and LUMO (Fig. S7)                 | S7     |
| Theoretically generated UV-Visible absorption spectra of <b>ICT3</b> (Fig. S8)                                | S7     |
| NMR spectra of the intermediates (Figs. S9-S27)                                                               | S8-S17 |

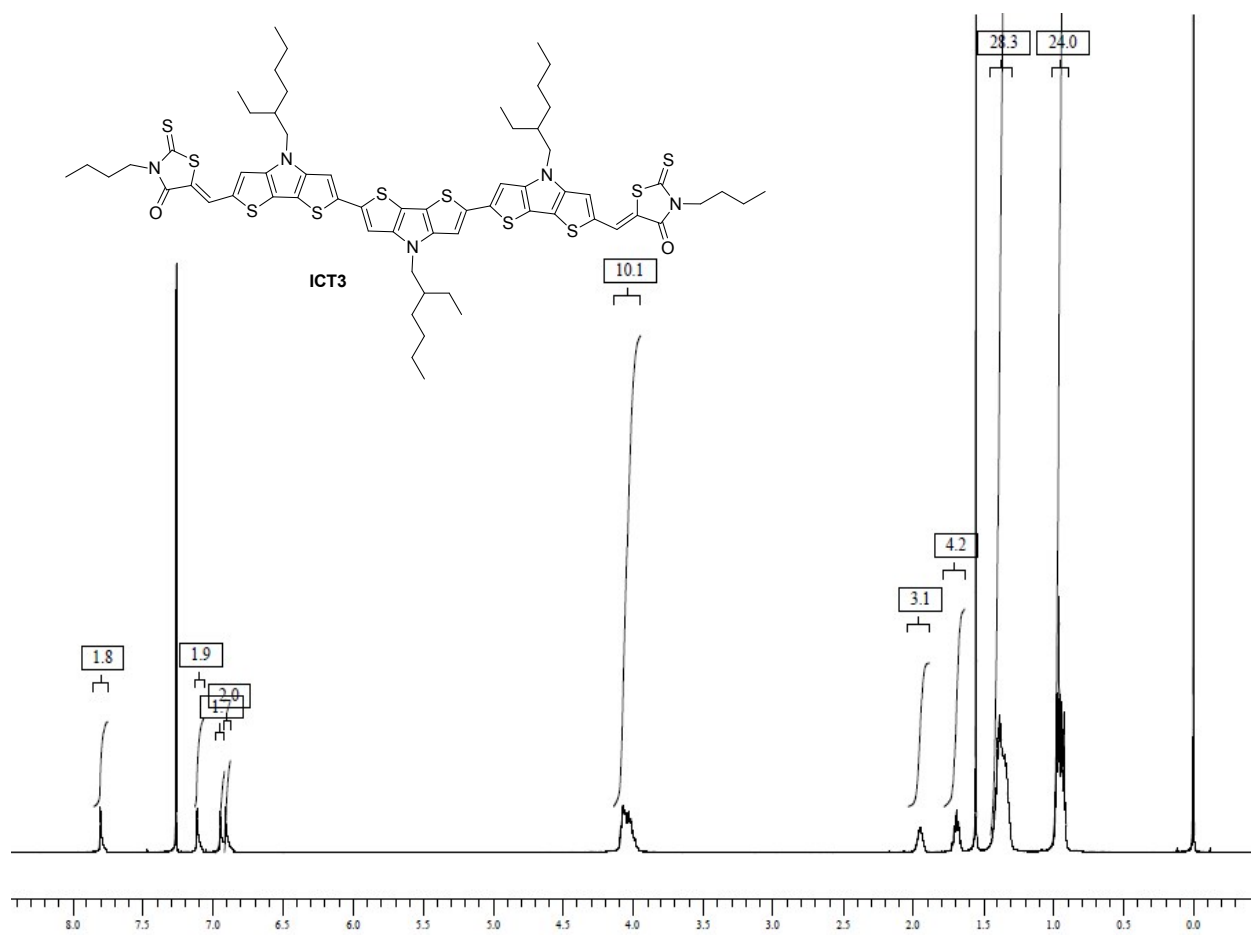

Fig. S1. <sup>1</sup>H NMR spectrum of ICT3

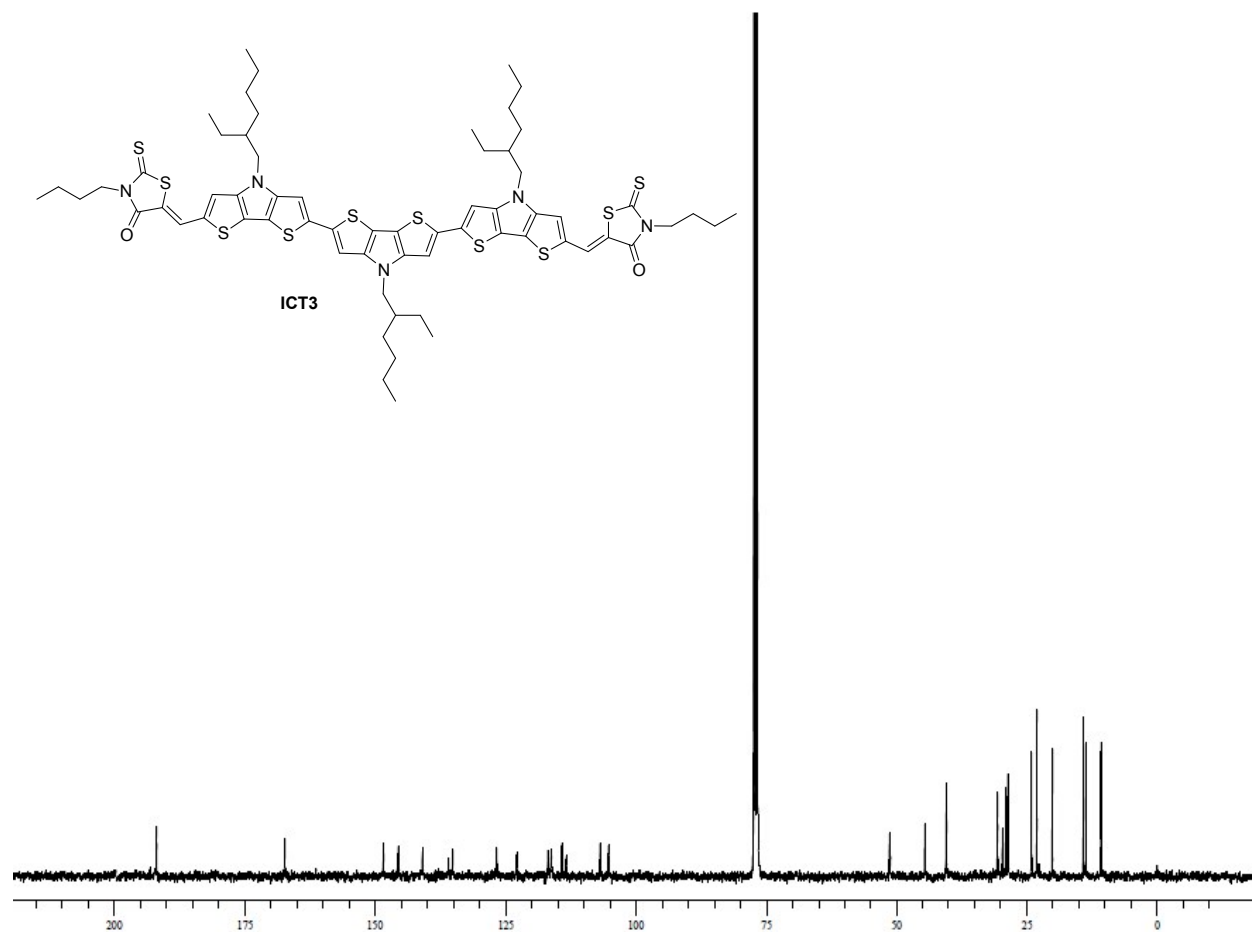

**Fig. S2.** <sup>13</sup>C NMR spectrum of ICT3

M V N RAJU , MNR-NF

Data: MNR0002.1B1[c] 24 Jun 2015 11:40 Cal: tof 8 Jun 2012 18:25  
Shimadzu Biotech Axima Performance 2.9.3.20110624: Mode Linear, Power: 69, Blanked, P.Ext. @ 2000 (bin 66)  
%Int. 105 mV[sum= 2737 mV] Profiles 1-26 Smooth Gauss 5

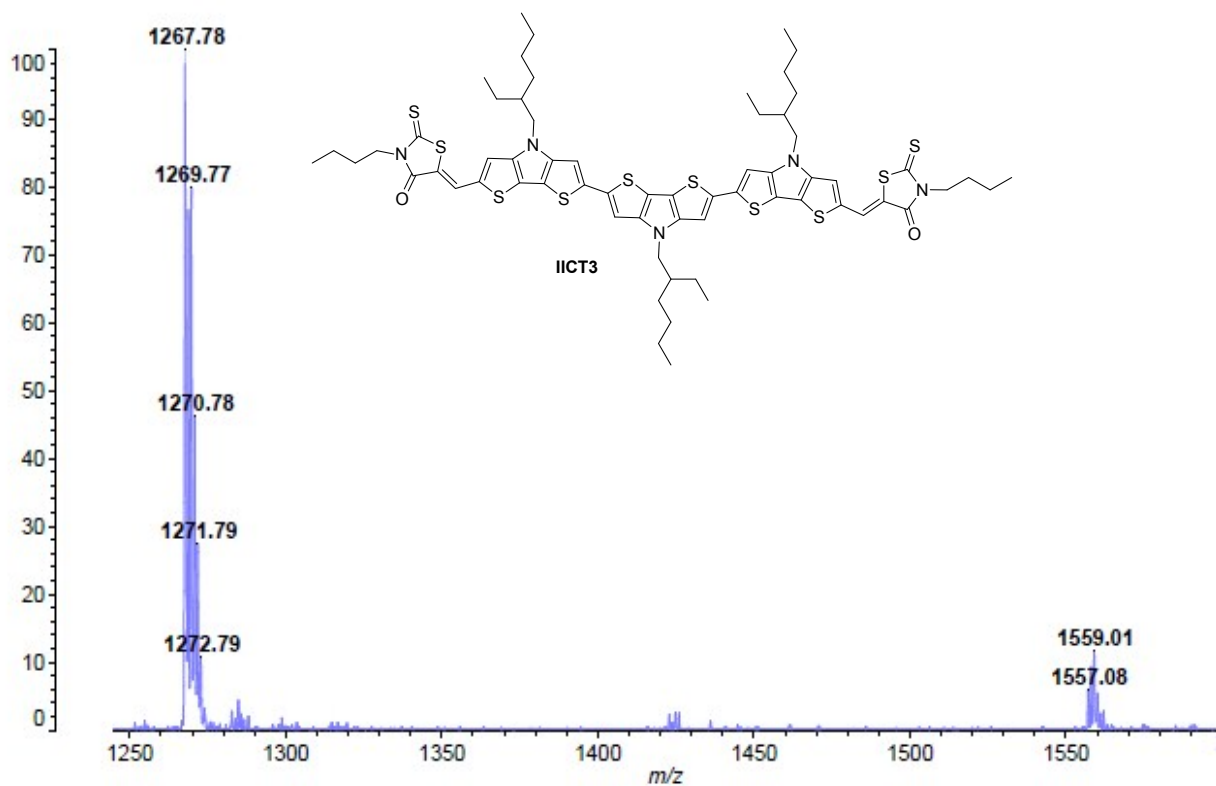

Fig. S3. MALDI-MS spectrum of ICT3

| Material Code | $\lambda_{\max}$ (nm) <sup>a</sup> | $\xi$ ( $\times 10^5 \text{ mol}^{-1} \text{ cm}^{-1}$ ) <sup>a</sup> | $\lambda_{\max}$ (nm) <sup>b</sup> | $E_{\text{o-o}}$ (eV) <sup>c</sup> | $E_{\text{g}}^{\text{opt}}$ (eV) <sup>d</sup> | $E_{\text{ox}}$ (V) | $E_{\text{HOMO}}$ (eV) | $E_{\text{LUMO}}$ (eV) <sup>e</sup> |
|---------------|------------------------------------|-----------------------------------------------------------------------|------------------------------------|------------------------------------|-----------------------------------------------|---------------------|------------------------|-------------------------------------|
| ICT1          | 586                                | 1.71                                                                  | 604                                | 1.96                               | 1.68                                          | 0.29                | -5.39                  | -3.43                               |
| ICT2          | 594                                | 1.65                                                                  | 608                                | 2.02                               | 1.63                                          | 0.38                | -5.48                  | -3.46                               |

  

| Active layer                       | $J_{\text{sc}}$ (mA/cm <sup>2</sup> ) | $V_{\text{oc}}$ (V) | FF   | PCE (%) | $R_{\text{s}}$ ( $\Omega \text{ cm}^2$ ) | $R_{\text{sh}}$ ( $\Omega \text{ cm}^2$ ) |
|------------------------------------|---------------------------------------|---------------------|------|---------|------------------------------------------|-------------------------------------------|
| ICT1:PC <sub>71</sub> BM (as cast) | 6.84                                  | 0.92                | 0.44 | 2.77    | 24.06                                    | 510                                       |
| ICT2:PC <sub>71</sub> BM (as cast) | 7.26                                  | 0.96                | 0.47 | 3.27    | 22.16                                    | 564                                       |
| ICT1:PC <sub>71</sub> BM (TSA)     | 10.15                                 | 0.87                | 0.58 | 5.12    | 12.92                                    | 686                                       |
| ICT2:PC <sub>71</sub> BM (TSA)     | 10.68                                 | 0.92                | 0.60 | 5.90    | 9.08                                     | 746                                       |

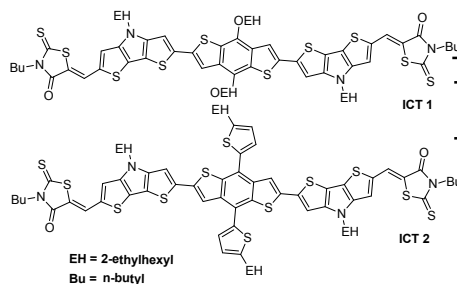

<sup>a</sup>in dilute chloroform solution (10  $\mu\text{M}$ ), <sup>b</sup>in thin film cast from chloroform solution, <sup>c</sup>estimated from intersection of absorption and emission spectra in chloroform solution, <sup>d</sup>estimated from  $E_{\text{g}}^{\text{opt}}=1240/\lambda_{\text{onset}}$ ,  $\lambda_{\text{onset}}$  is onset absorption wavelength in thin film, <sup>e</sup> $E_{\text{LUMO}} = E_{\text{HOMO}} - E_{\text{o-o}}$ .

**Fig. S4.** Chemical structures of ICT1 and ICT2 and their photophysical, electrochemical and photovoltaic data

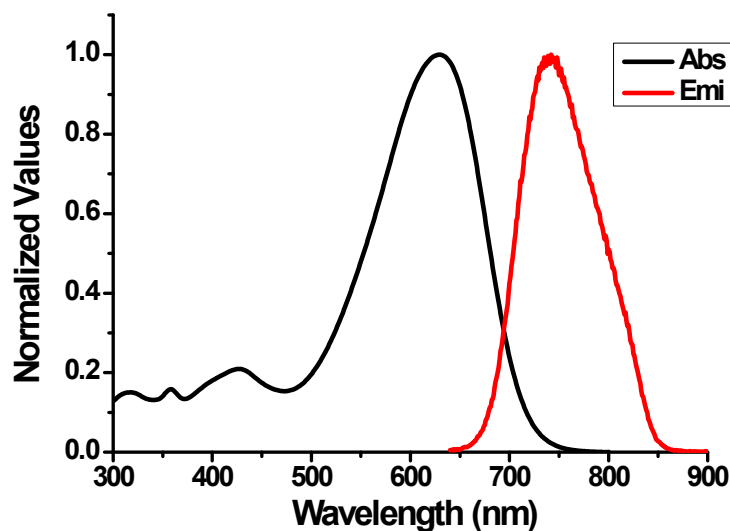

**Fig. S5.** Absorption and fluorescence spectra of ICT3 (10  $\mu\text{M}$ ) measured in chloroform solution.

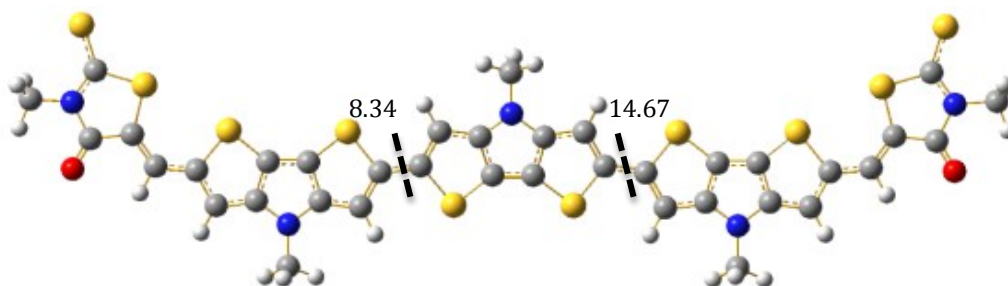

**Fig. S6.** Optimized structure of ICT3.

**Table S1** Calculated properties of ICT3 at M06/6-31G(d,p) level. HOMO and LUMO energies (eV), HOMO–LUMO gap HLG (eV), Optical gap OG (eV), oscillator strength  $f$ , the wavelength maxima, the major contribution (%) to the first excited state and the dipole moment  $\mu_g$  (D).<sup>a</sup>

| Molecule | HOMO (eV)    | LUMO (eV)    | HLG (eV)    | $\lambda$ (nm) | OG (eV)      | $f$          | Major contribution (%)                                                               | $\mu_g^a$ (D) |
|----------|--------------|--------------|-------------|----------------|--------------|--------------|--------------------------------------------------------------------------------------|---------------|
| ICT3     | -5.1         | -2.69        | 2.41        | 628            | 1.974        | 3.520        | H -1 $\rightarrow$ L+1 (4%)<br>H $\rightarrow$ L (95%)                               | 9.07          |
|          | <i>-5.04</i> | <i>-2.71</i> | <i>2.33</i> | <i>676</i>     | <i>1.834</i> | <i>3.707</i> | <i>H -1 <math>\rightarrow</math> L+1 (4%)<br/>H <math>\rightarrow</math> L (93%)</i> | <i>12.27</i>  |

<sup>a</sup> values given in *Italic font* are the values obtained in the solvent phase CF.

**Table S2** Calculated properties of ICT3 at B3LYP/6-31G(d,p) level. HOMO and LUMO energies (eV), HOMO–LUMO gap HLG (eV), Optical gap OG (eV), oscillator strength  $f$ , the wavelength maxima, the major contribution (%) to the first excited state and the dipole moment  $\mu_g$  (D).<sup>a</sup>

| Molecule | HOMO (eV)    | LUMO (eV)    | HLG (eV)    | $\lambda$ (nm) | OG           | $f$          | Major contribution (%)                    | $\mu_g^b$ (D) |
|----------|--------------|--------------|-------------|----------------|--------------|--------------|-------------------------------------------|---------------|
| ICT3     | -4.82        | -2.76        | 2.06        | 664            | 1.867        | 3.291        | H $\rightarrow$ L (99%)                   | 9.72          |
|          | <i>-4.75</i> | <i>-2.76</i> | <i>1.97</i> | <i>724</i>     | <i>1.712</i> | <i>3.484</i> | <i>H <math>\rightarrow</math> L (98%)</i> | <i>13.15</i>  |

<sup>a</sup> values given in *Italic font* are the values obtained in the solvent phase CF.

**Table S3** Calculated properties of ICT3 at PBE/6-31G(d,p) level. HOMO and LUMO energies (eV), HOMO–LUMO gap HLG (eV), Optical gap OG (eV), oscillator strength  $f$ , the wavelength maxima, the major contribution (%) to the first excited state and the dipole moment  $\mu_g$  (D).<sup>a</sup>

| Molecule | HOMO (eV) | LUMO (eV) | HLG (eV) | $\lambda$ (nm) | OG (eV) | $f$   | Major contribution (%)                                                             | $\mu_g$ (D) |
|----------|-----------|-----------|----------|----------------|---------|-------|------------------------------------------------------------------------------------|-------------|
| ICT3     | -4.82     | -2.76     | 2.06     | 839            | 1.4770  | 1.975 | H -1 $\rightarrow$ L+1 (6%)<br>H $\rightarrow$ L+2 (3%)<br>H $\rightarrow$ L (91%) | 9.70        |

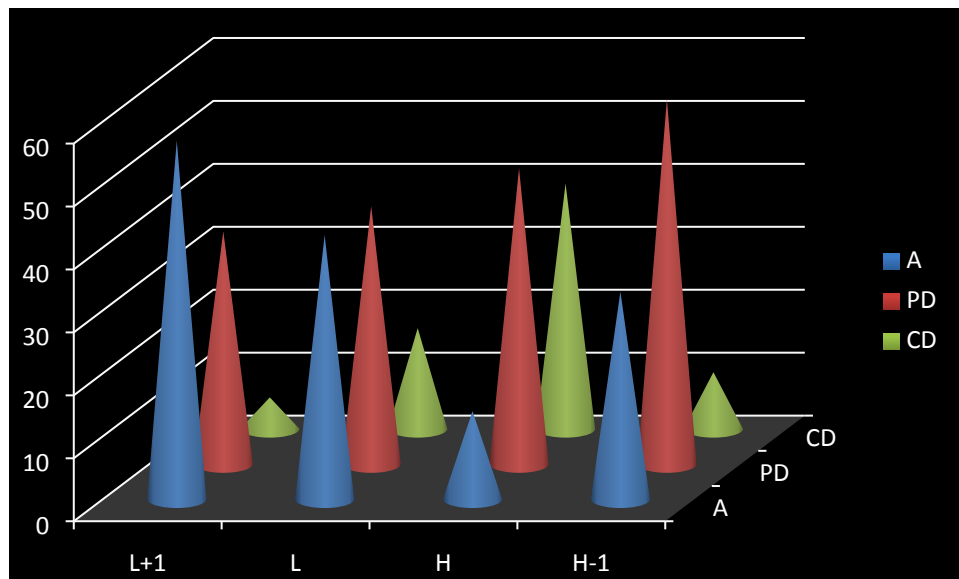

**Fig. S7.** Graphical representation of percentage contribution of different moieties of ICT3.

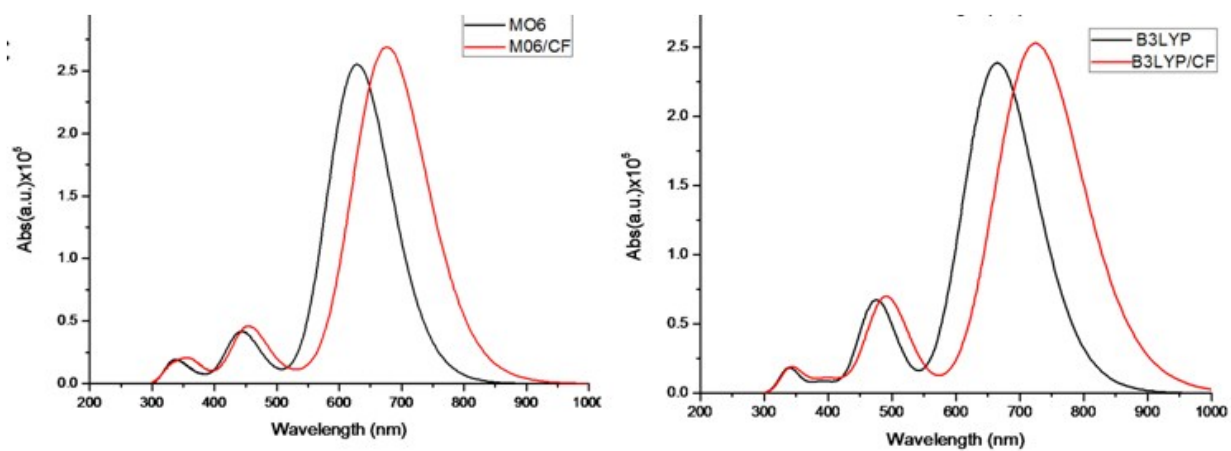

**Fig. S8.** Simulated UV-Vis Absorption spectra of ICT3 using M06 and B3LYP in gas phase and solvent chloroform (CF)

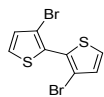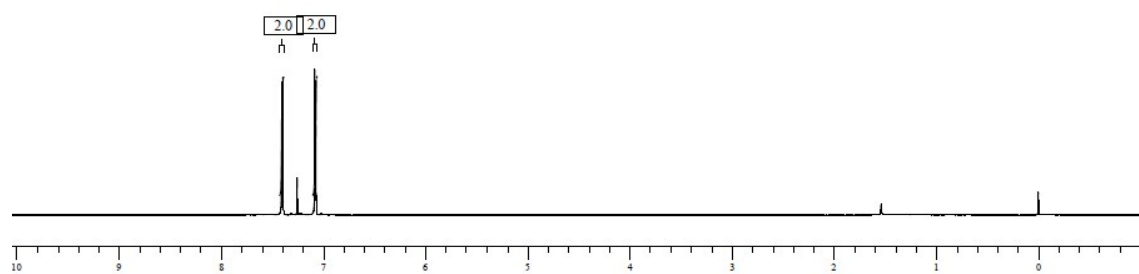

**Fig. S9.** <sup>1</sup>H NMR spectrum of **1**

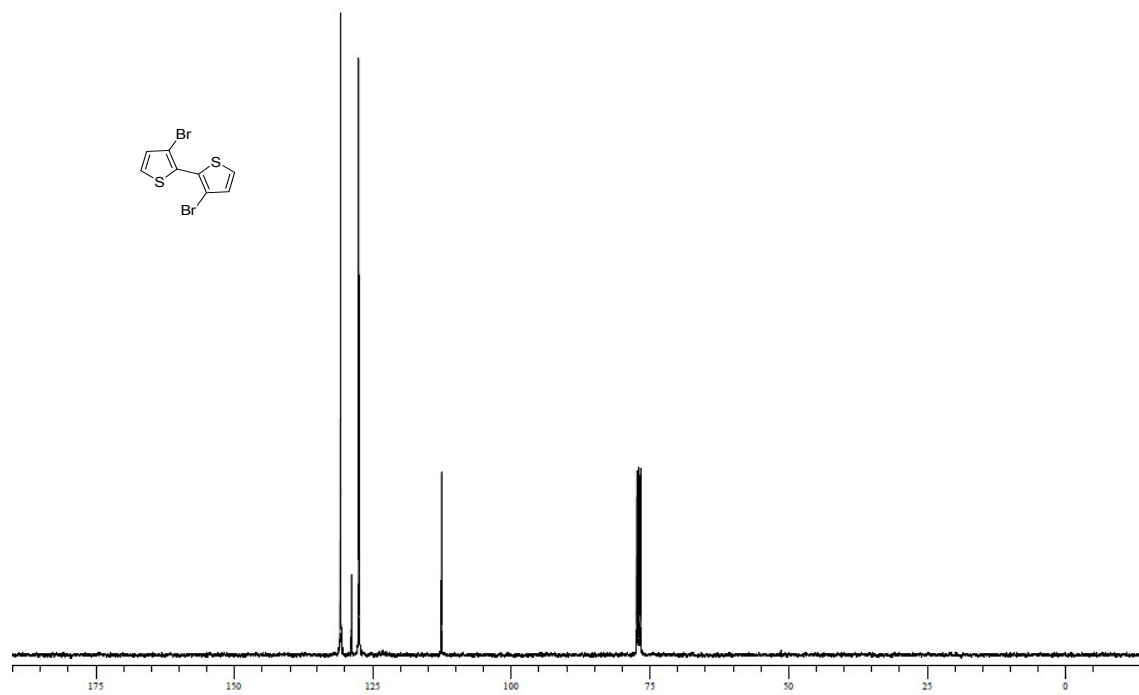

**Fig. S10.** <sup>13</sup>C NMR spectrum of **1**



Acq. Data Name: JRAO-MR-BRBT  
Creation Parameters: Average(MS1) Time:0.40\_0.43  
Comment: JRAO-MR-BRBT, EIHRMS ,DIP-300

Experiment Date/Time: 08-09-2016 17:47:56  
Ionization Mode: EI+

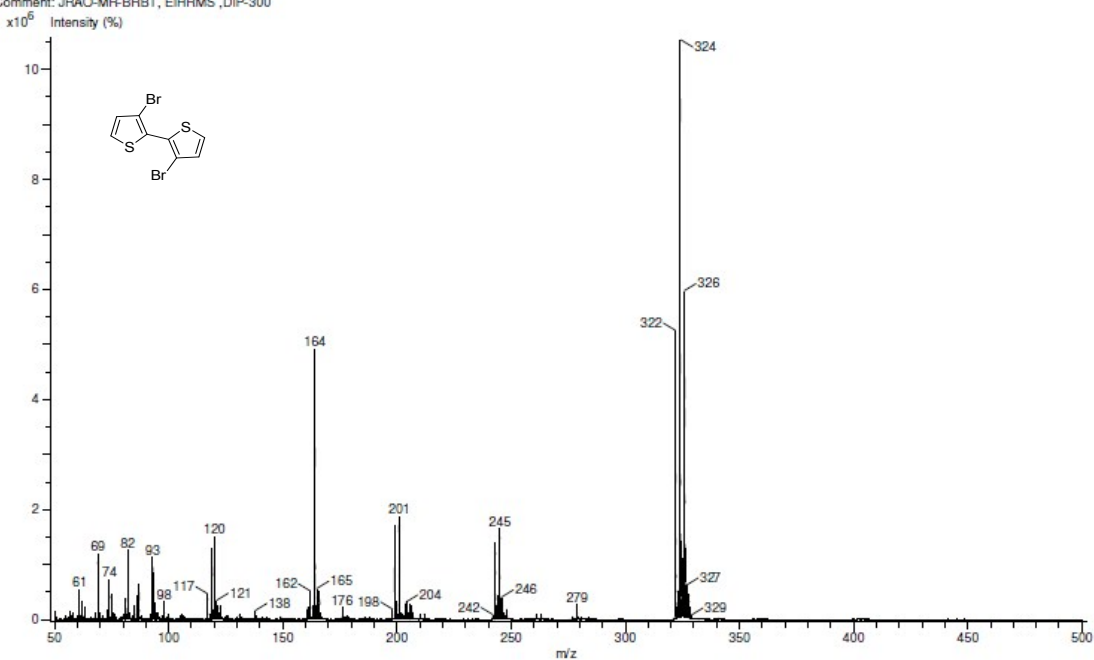

Fig. S11. EI-MS spectrum of 1

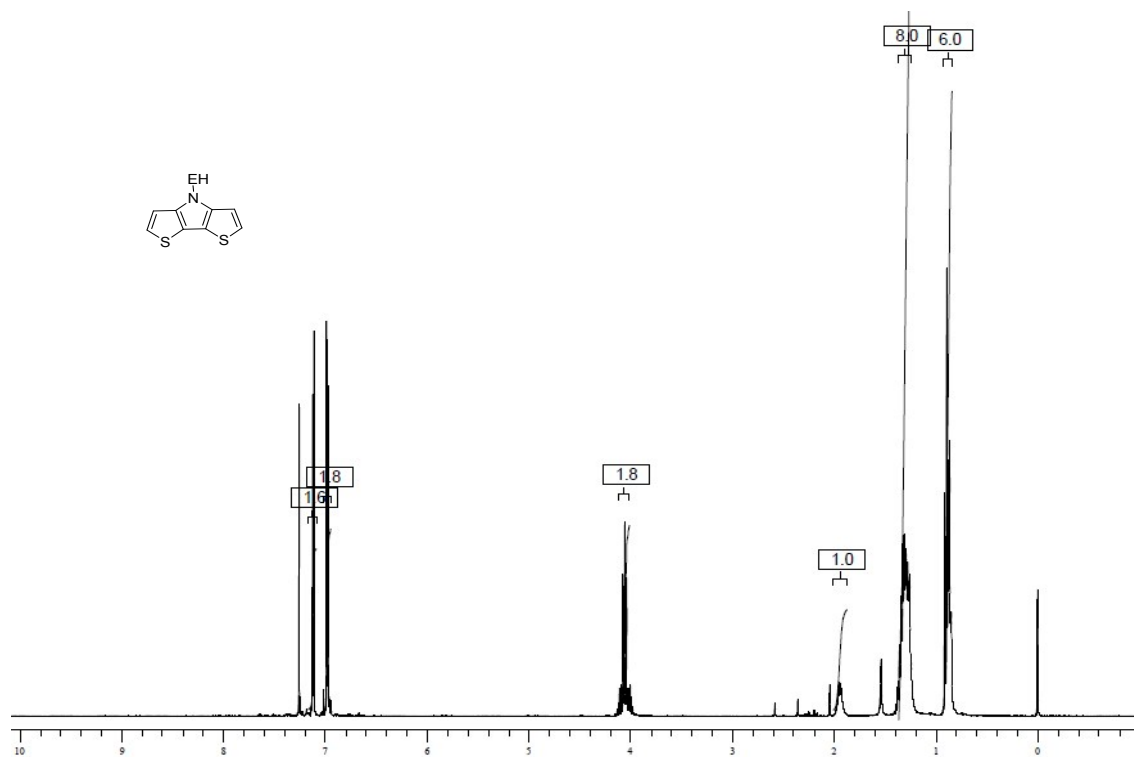

Fig. S12. <sup>1</sup>H NMR spectrum of 2

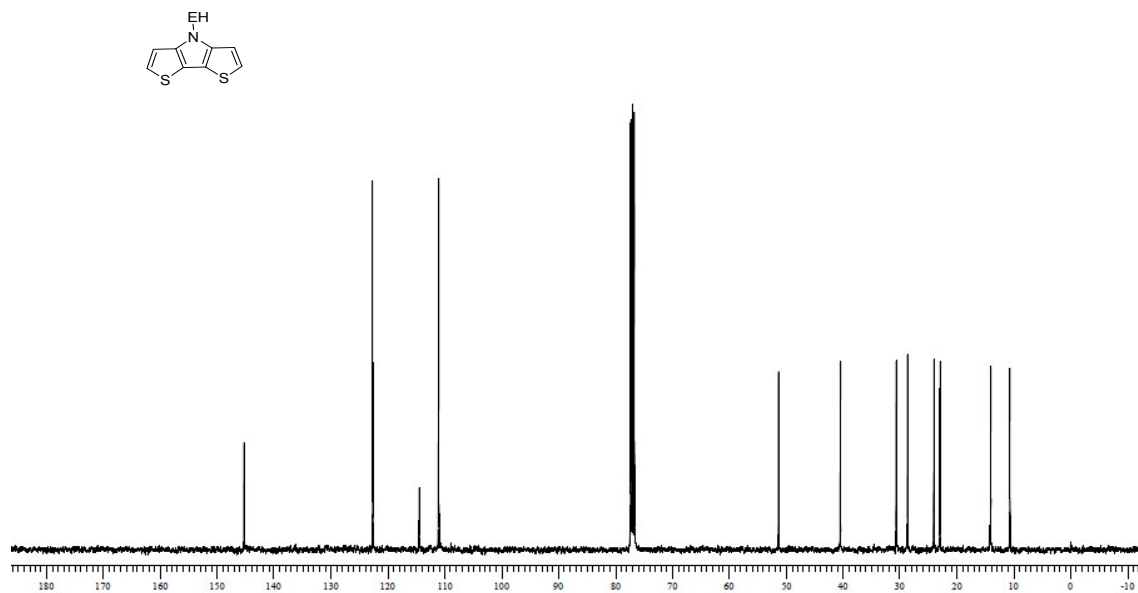

Fig. S13.  $^{13}\text{C}$  NMR spectrum of **2**

=== CPC DIVISION @ CSIR-IICT ===

Sample Name : B Menohar reddy  
 Sample ID : IRAD-MR-DTP  
 Original Data File : D:\LCMS\Data\ESI-APCI Mass\2016\02-09-2016\IRAD-MR-DTP.fid

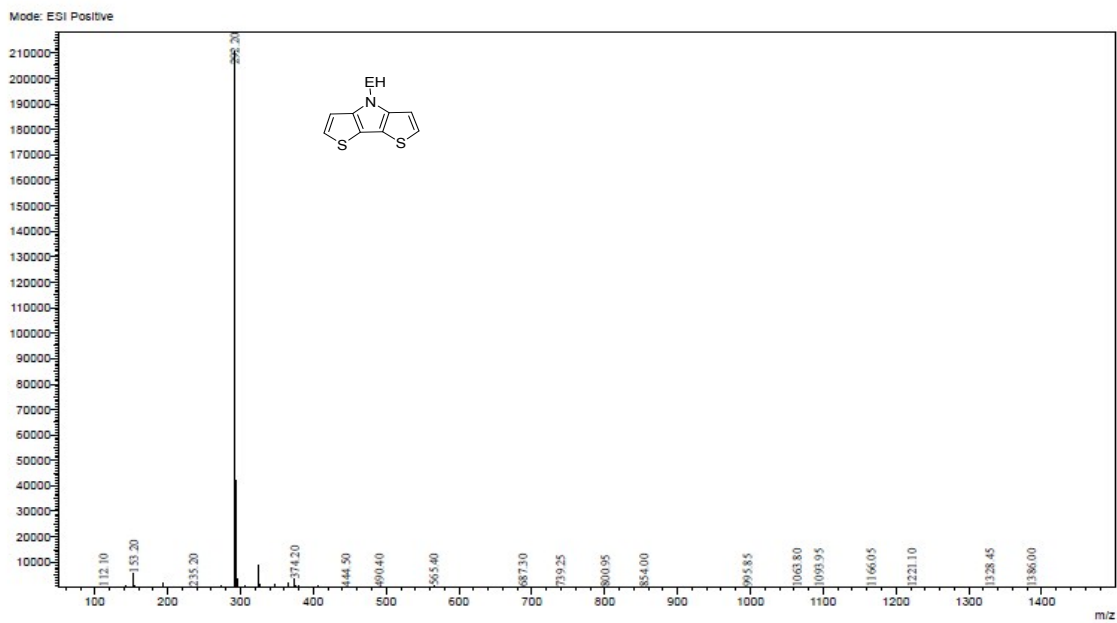

Fig. S14. ESI-MS spectrum of **2**

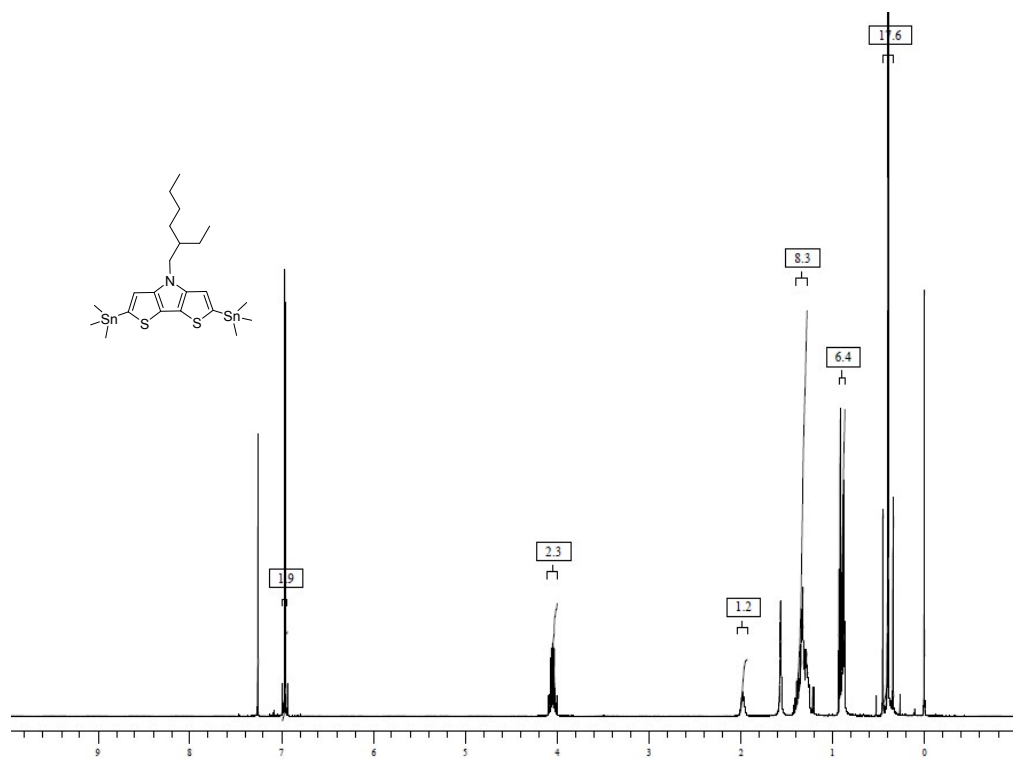

**Fig. S15.** <sup>1</sup>H NMR spectrum of **3**

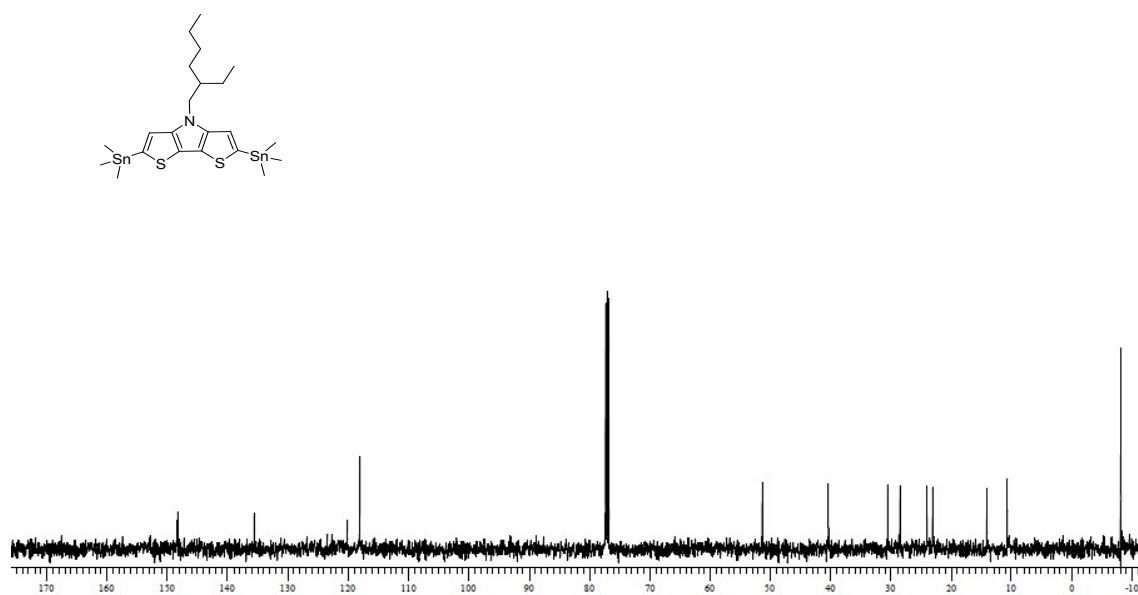

**Fig. S16.** <sup>13</sup>C NMR spectrum of **3**

Acq. Data Name: JRAO-MR-DTPS  
 Creation Parameters: Average(MS1) Time:1.83..1.91  
 Comment: JRAO-MR-DTPS, EIHRMS\_DIP-300

Experiment Date/Time: 08-09-2016 17:52:15  
 Ionization Mode: EI+

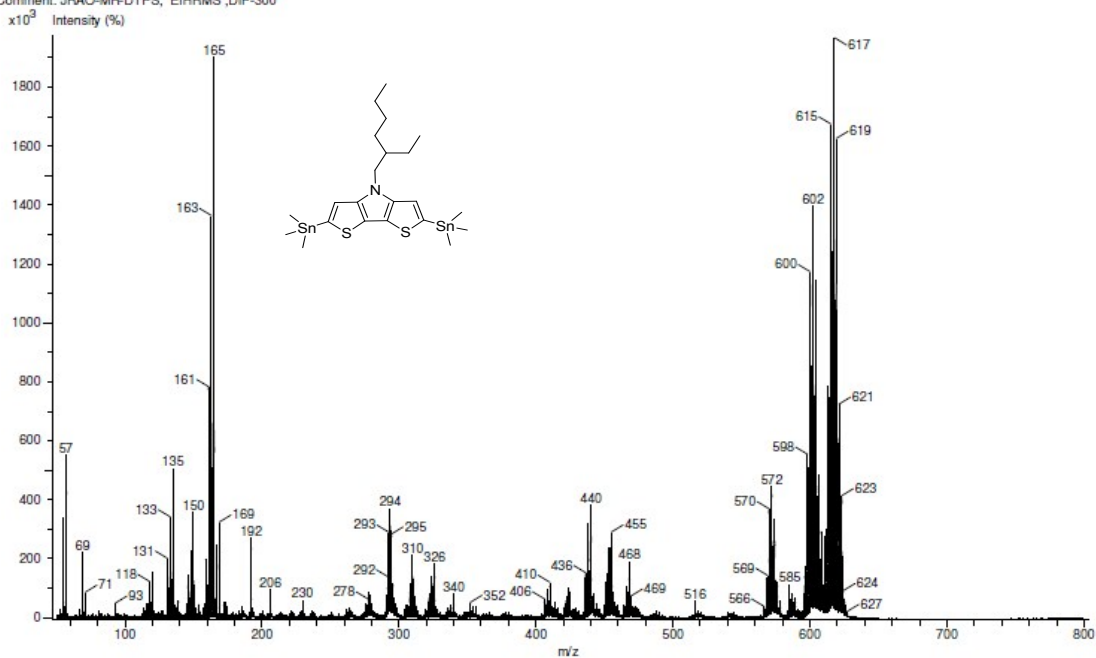

Fig. S17. EI-MS spectrum of 3

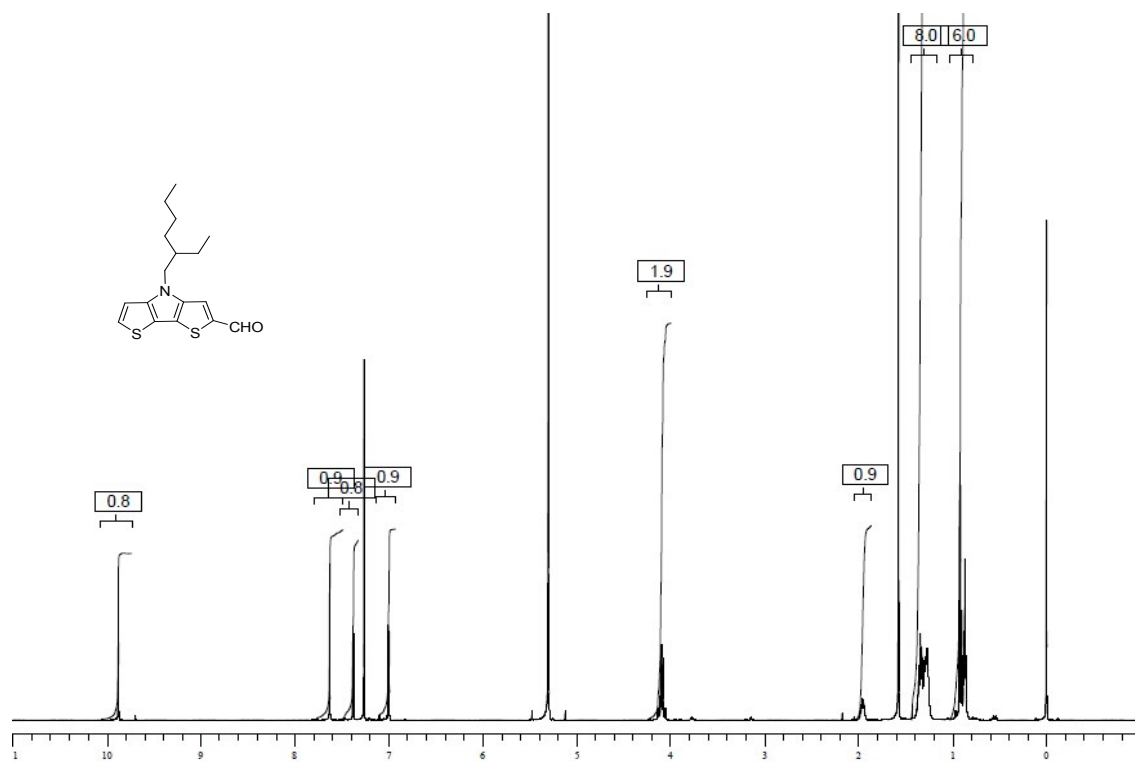

Fig. S18. <sup>1</sup>H NMR spectrum of 4

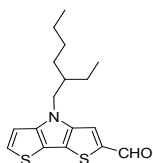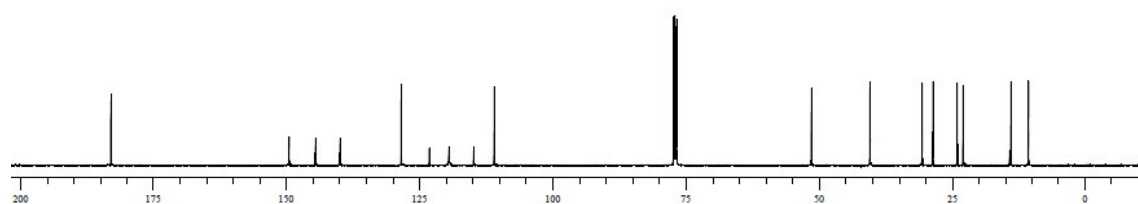

Fig. S19. <sup>13</sup>C NMR spectrum of 4

=== CPC DIVISION @ CSIR-IICT ===

Sample Name : B Manohar reddy  
 Sample ID : JRAO-MR-DTPA  
 Original Data File : D:\LCMS\Data\ESI-APCI Mass\2016\02-09-2016\JRAO-MR-DTPA.lcd

Mode: ESI Positive

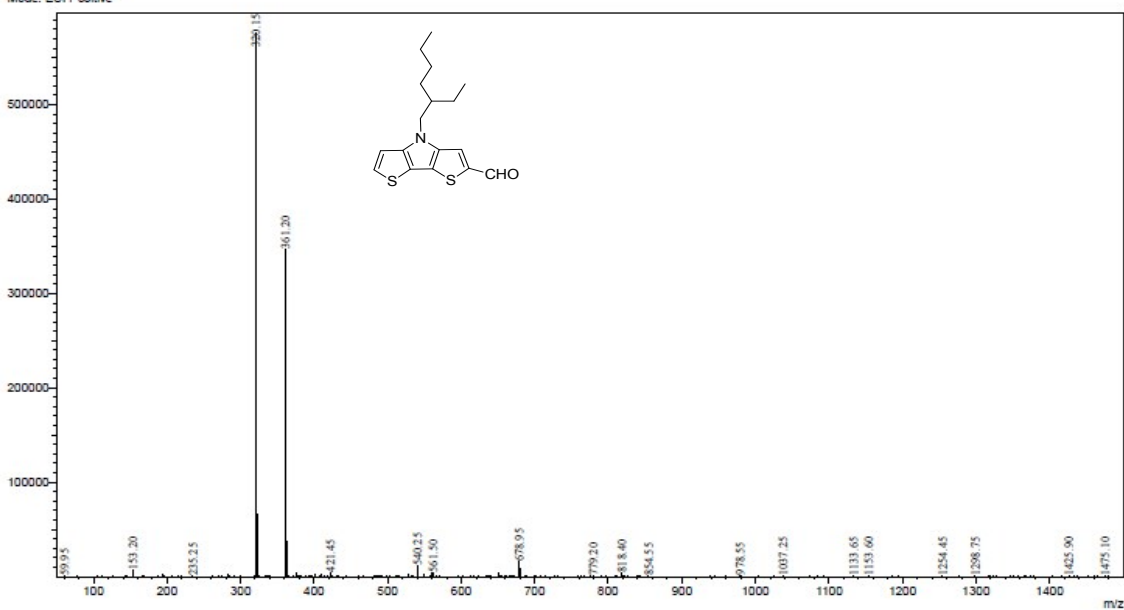

Fig. S20. ESI-MS spectrum of 4

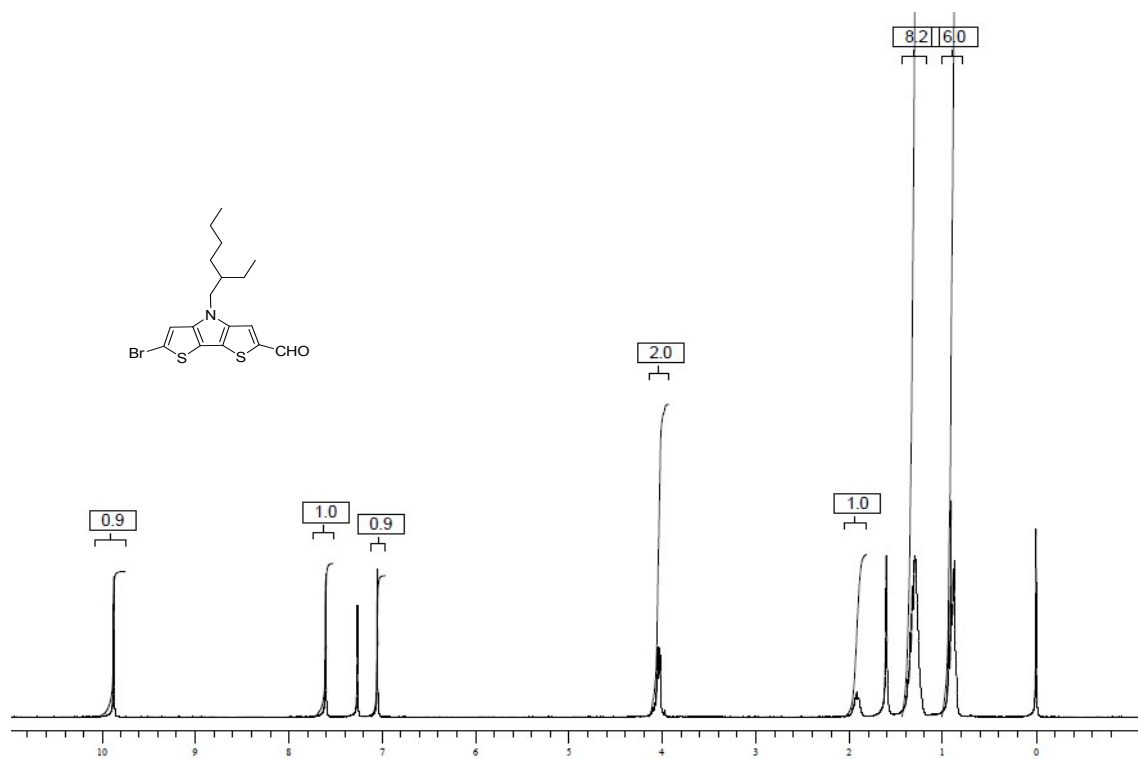

**Fig. S21.** <sup>1</sup>H NMR spectrum of **5**

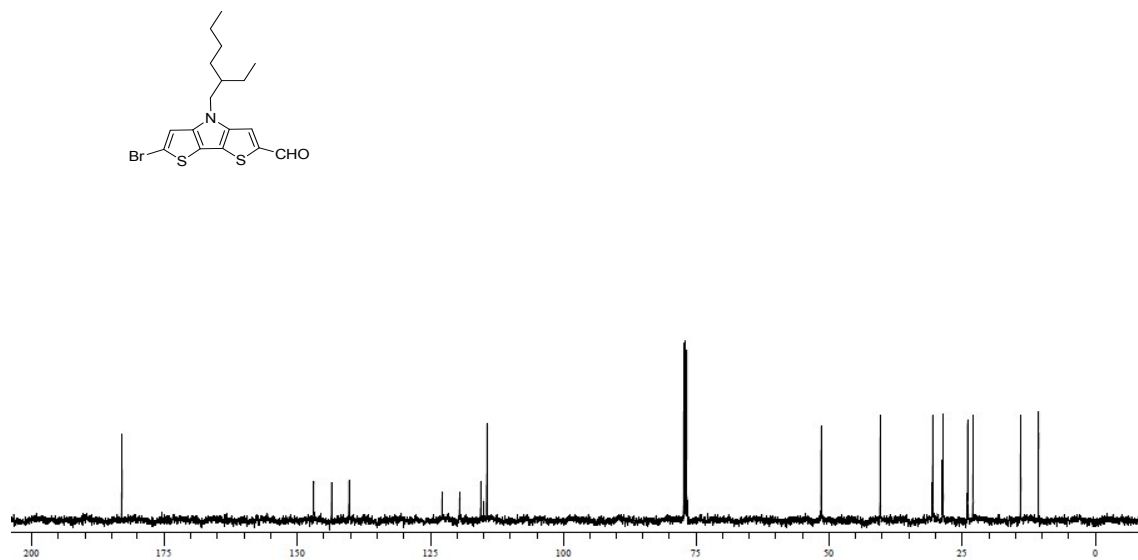

**Fig. S22.** <sup>13</sup>C NMR spectrum of **5**

Sample Name : B Manohar reddy  
 Sample ID : JRAO-MR-DTPBR  
 Original Data File : D:\LCMS\Data\ESI-APCI Mass\2016\02-09-2016\JRAO-MR-DTPBR.lcd

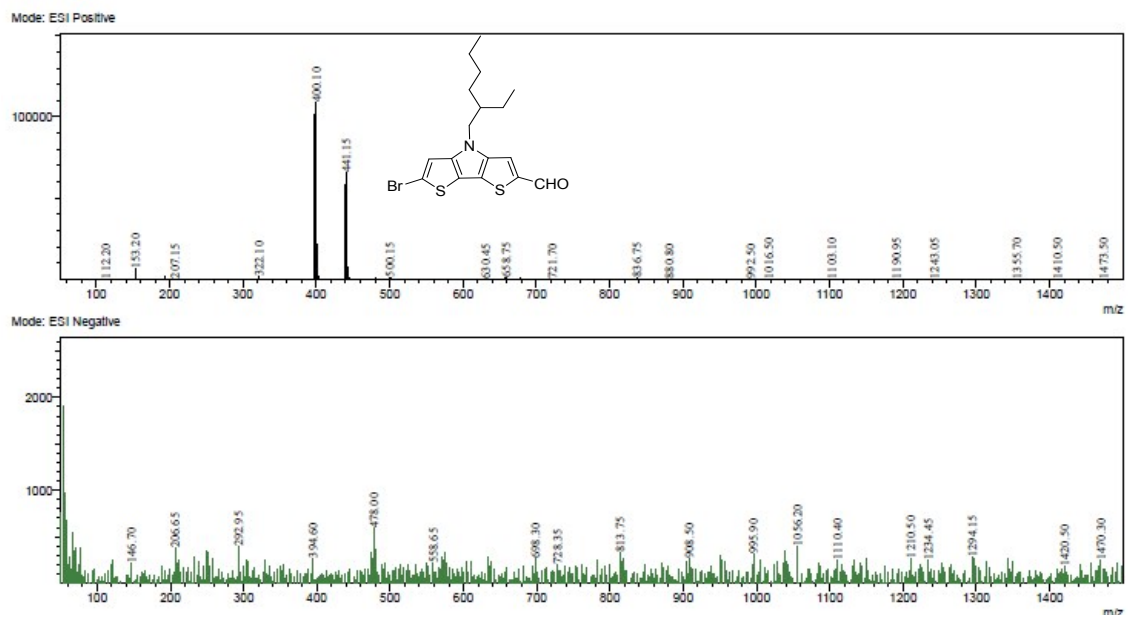

Fig. S23. ESI-MS spectrum of 5

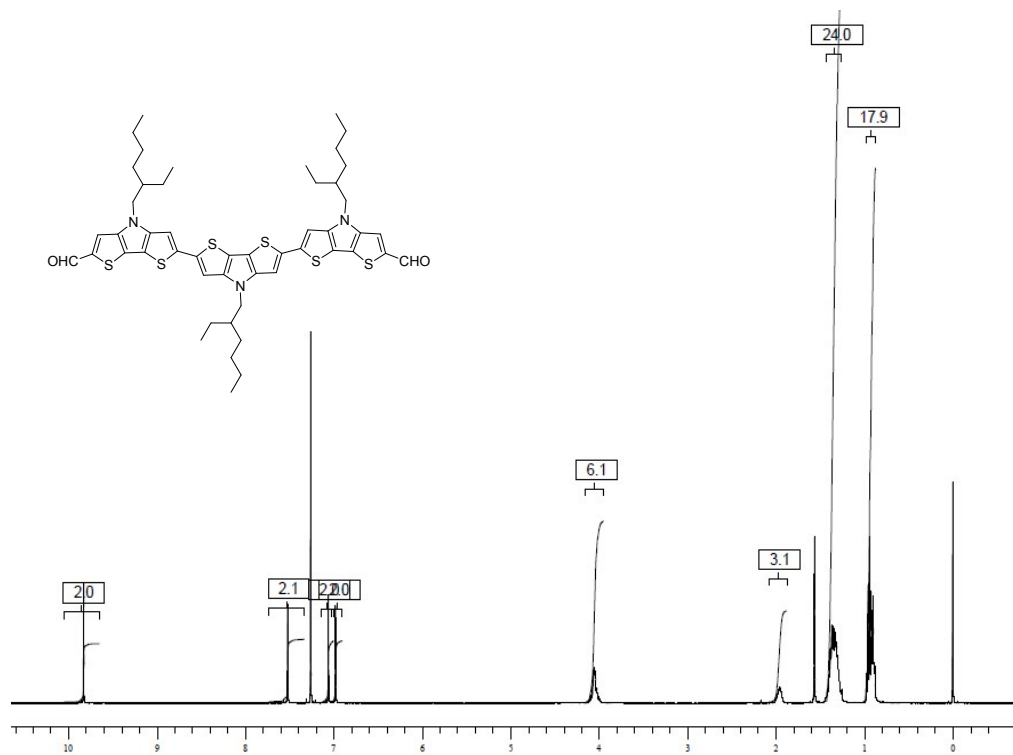

Fig. S24. <sup>1</sup>H NMR spectrum of 6

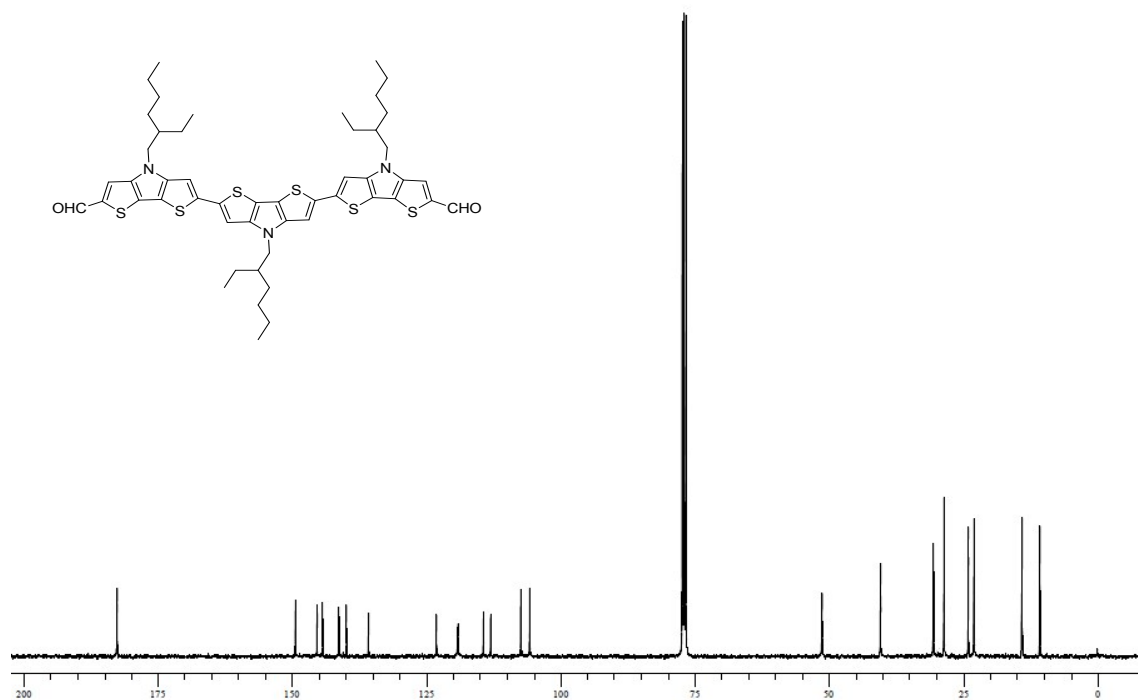

**Fig. S25.**  $^{13}\text{C}$  NMR spectrum of **6**

MANOHAR REDDY , JRAO-MR-NA

Data: MR-NA-10001.1G1[c] 12 Sep 2016 18:48 Cal: TOF MIX-12-09-16 REF 12 Sep 2016 18:46  
 Shimadzu Biotech Axima Performance 2.9.3.20110624: Mode Reflectron\_HiRes, Power: 65, Blanked, P.Ext. @ 1500 (bin 79)  
 %Int. 27 mV[sum= 2696 mV] Profiles 1-100 Smooth Gauss 5

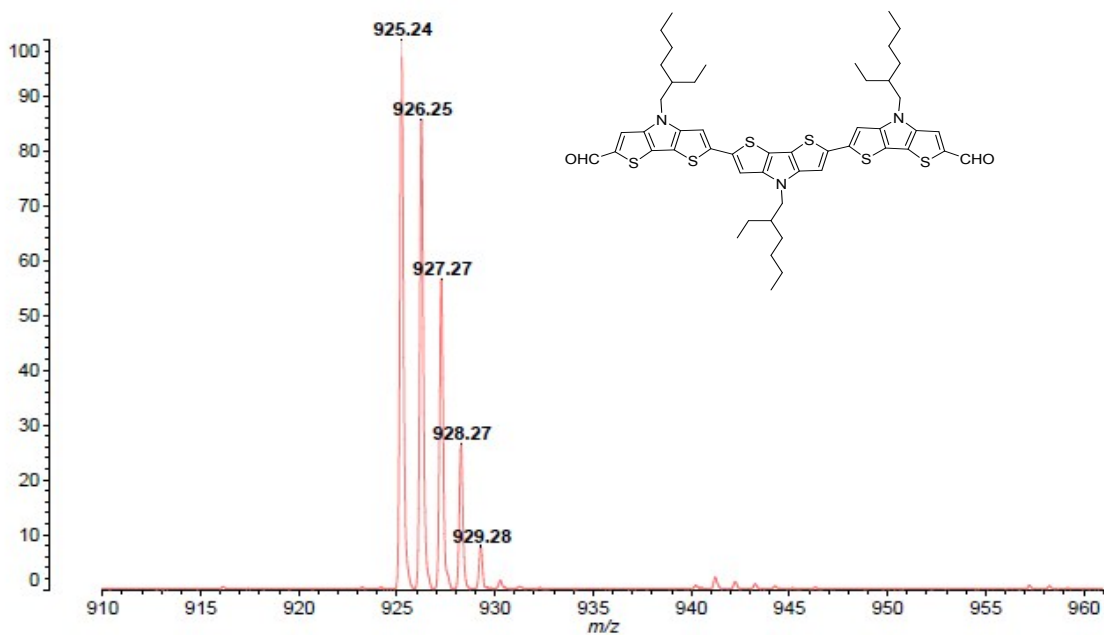

**Fig. S26.** ESI-MS spectrum of **6**



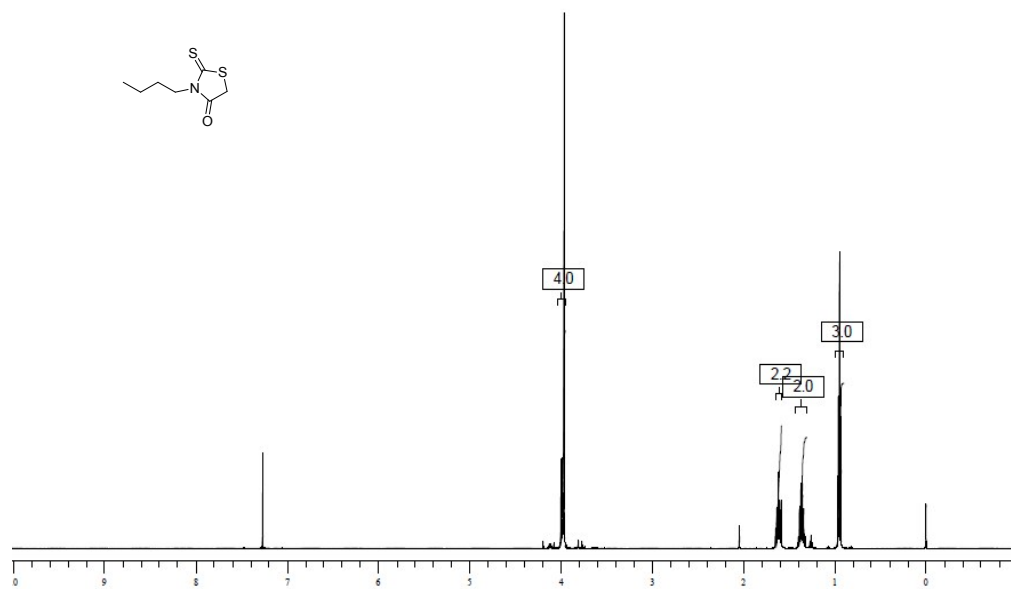

**Fig. S27.** <sup>1</sup>H NMR spectrum of *n*-butyl rhodanine
